# Supplementary material
Source: PubMed Central journal article supplement (PMC8824196)
Supplement: aem.01849-21-s0001.pdf [file aem.01849-21-s0001.pdf]

# SUPPLEMENTAL MATERIAL

## Decomposition of Growth Curves into Growth Rate and Acceleration: a Novel Procedure to Monitor Bacterial Growth and the Time-Dependent Effect of Antimicrobials

M. Luisa Navarro-Pérez, M. Coronada Fernández-Calderón and Virginia Vadillo-Rodríguez

**Table 1S.** Summary of growth parameters for *S. sanguinis* exposed to different sub-MIC concentrations of SEEP. These parameters, i.e. lag time ( $t_0$ ), starting growth rate ( $\gamma_0$ ), initial acceleration of the growth ( $a_0$ ), maximum growth rate ( $\gamma_{max}$ ), maximum acceleration ( $a_{max}$ ) and deceleration ( $a_{min}$ ) of the growth and the total number of cells at the beginning of the saturation phase ( $N_s$ ) were directly obtained from the growth, growth rate and acceleration curves determined for each condition.

|                                                                | Propolis concentration (%) |             |             |             |             |             |
|----------------------------------------------------------------|----------------------------|-------------|-------------|-------------|-------------|-------------|
|                                                                | 0                          | 0,003       | 0,006       | 0,012       | 0,020       | 0,050       |
| $t_0$ (h)                                                      | 4,9 ± 0,5                  | 5,2 ± 0,6   | 5,3 ± 0,6   | 7,3 ± 1,3   | 7,8 ± 1,1   | 10,7 ± 0,6  |
| $\gamma_0$ ( $10^6$ cfu ml <sup>-1</sup> h <sup>-1</sup> )     | 4,2 ± 0,4                  | 3,4 ± 0,3   | 2,7 ± 0,4   | 1,6 ± 0,4   | 1,2 ± 0,3   | 0,9 ± 0,2   |
| $a_0$ ( $10^6$ cfu ml <sup>-1</sup> h <sup>-2</sup> )          | 2,1 ± 0,3                  | 1,7 ± 0,3   | 1,5 ± 0,2   | 1,1 ± 0,3   | 0,9 ± 0,5   | 0,7 ± 0,4   |
| $\gamma_{max}$ ( $10^6$ cfu ml <sup>-1</sup> h <sup>-1</sup> ) | 25,2 ± 1,2                 | 25,6 ± 1,1  | 25,1 ± 1,5  | 18,9 ± 1,4  | 8,1 ± 1,8   | 4,8 ± 2,8   |
| $t_{max}$ (h)                                                  | 8,3 ± 0,6                  | 8,7 ± 0,6   | 8,8 ± 0,7   | 10,0 ± 1,5  | 10,5 ± 1,6  | 12,5 ± 0,7  |
| $a_{max}$ ( $10^6$ cfu ml <sup>-1</sup> h <sup>-2</sup> )      | 8,9 ± 1,1                  | 8,7 ± 1,2   | 8,1 ± 1,3   | 5,5 ± 1,1   | 3,1 ± 0,9   | 1,0 ± 0,4   |
| $t_{amax}$ (h)                                                 | 7,5 ± 0,5                  | 7,5 ± 0,5   | 7,7 ± 0,6   | 8,5 ± 1,1   | 9,3 ± 1,2   | 11 ± 1,0    |
| $a_{min}$ ( $10^6$ cfu ml <sup>-1</sup> h <sup>-2</sup> )      | - 8,3 ± 0,7                | - 8,0 ± 0,7 | - 7,4 ± 0,4 | - 6,0 ± 0,9 | - 3,3 ± 1,2 | - 0,6 ± 0,4 |
| $t_{amin}$ (h)                                                 | 9,8 ± 0,5                  | 10,1 ± 0,7  | 10,5 ± 0,8  | 11,5 ± 1,1  | 12,0 ± 0,7  | 14,0 ± 0,7  |
| $N_s$ ( $10^6$ )                                               | 97 ± 7                     | 100 ± 9     | 95 ± 12     | 72 ± 14     | 33 ± 9      | 23 ± 8      |
| $t_{Ns}$ (a = 0) (h)                                           | 13,0 ± 0,7                 | 13,5 ± 0,7  | 13,5 ± 0,7  | 15,0 ± 1,3  | 16,0 ± 1,6  | 18,0 ± 1,5  |

16 **Figure 1S.** Growth, growth rate and acceleration of the growth for *S. sanguinis* in the absence  
 17 of propolis. The geometrical lag time ( $t_0$  geometrical) is defined as the point of intersection of  
 18 the tangent to the growth curve at the exponential phase with the time axis. The physiological  
 19 lag time (physiological  $t_0$ ) is determined by the onset of the accelerated growth regime (i.e.  $a_0$ ).  
 20

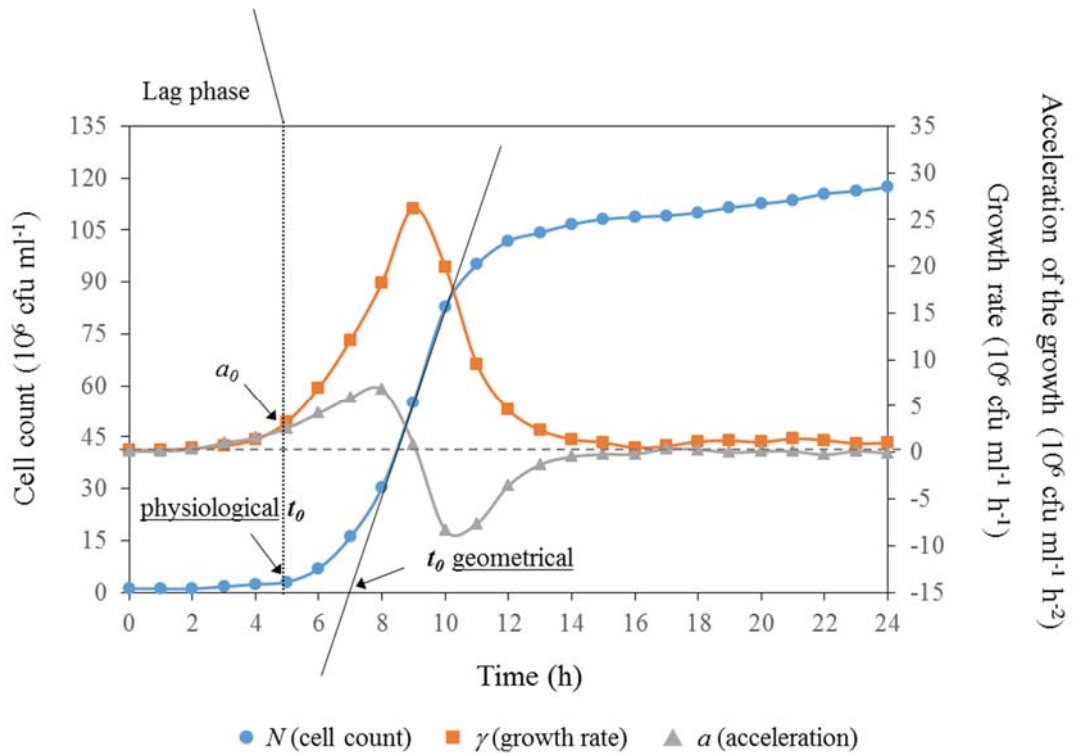

21  
 22  
 23  
 24  
 25  
 26  
 27  
 28  
 29  
 30  
 31  
 32  
 33

34 **Figure 2S.** Lag phase duration ( $t_0$ ) for cultures of *S. sanguinis* containing the different sub-MIC  
 35 concentrations of SEEP studied, together with the time points at which the resting growth  
 36 parameters occurs:  $\gamma_{max}$  ( $t_{max}$ );  $a_{max}$  ( $t_{amax}$ );  $a_{min}$  ( $t_{amin}$ );  $N_s$  ( $t_{Ns}$ ).  
 37

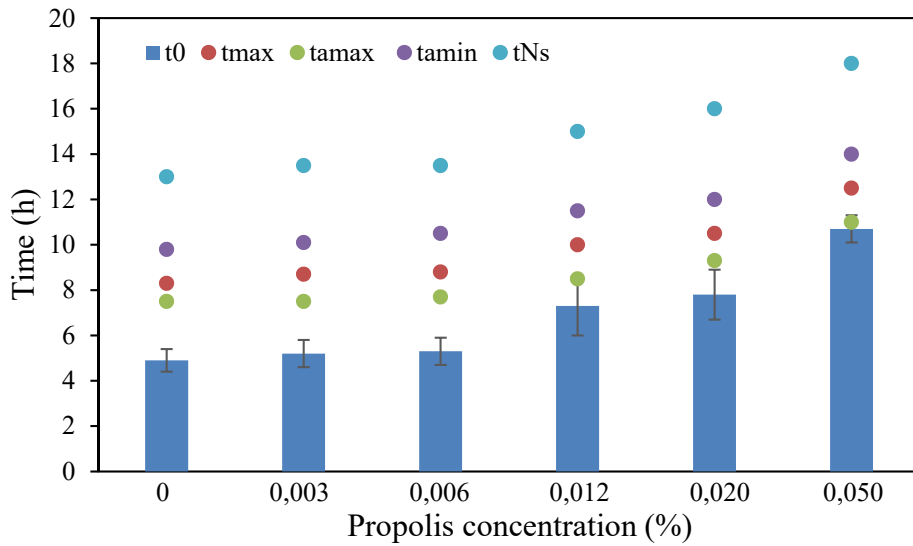

38  
 39  
 40  
 41 **Figure 3S.** Relation between the total number of cells at the beginning of the saturation phase  
 42 ( $N_s$ ) and the maximum growth rate ( $\gamma_{max}$ ) for *S. sanguinis* exposed to different sub-MIC  
 43 concentrations of SEEP.  
 44  
 45

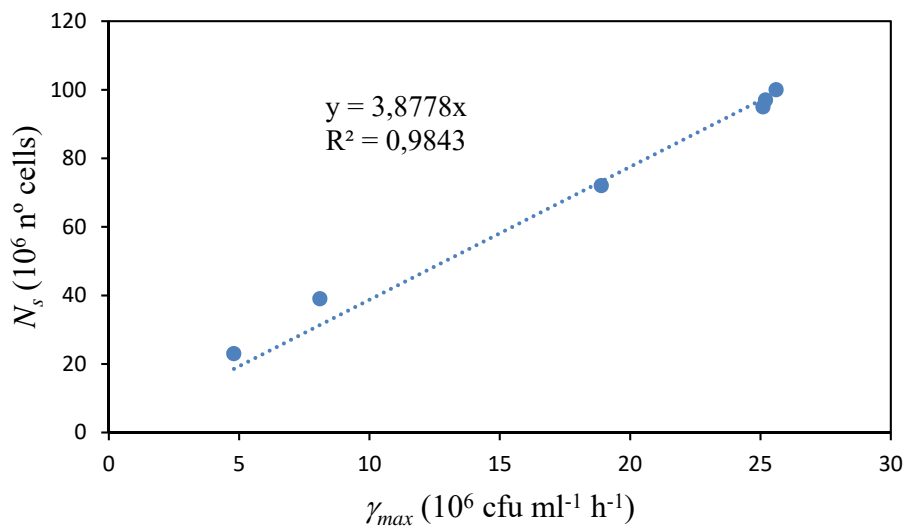

46  
 47
